# Supplementary material for: Assessing Empathy Capability in Large Language Models: Superior and Balanced Empathy Compared to Humans
Source: Research Square preprint supplement (doi:10.21203/rs.3.rs-8165418/v1), 2025-12-08
Supplement: Supplementary file 1 [file 12fa9f49bf87a97824a55957.docx]

Assessing Empathy Capability in Large Language Models: Superior and Balanced Empathy Compared to Humans

**Supplementary Material**

**Table S1.** The primitive 40 items and their original Chinese version.

| (a) | | Items |
| --- | --- | --- |
| 1 | Friend: When I was young, my parents rarely cared about me, but now that I'm an adult, they come to interfere with whether my marriage and what job I should get. Ridiculous! | |
| 2 | Friend: My parents always ask me to help him with trivial matters, like shopping and making appointments online, but they never learn even if I teach them. So frustrating! I have my own stuff to do! | |
| 3 | Friend: My dad is such a control freak. I didn’t dare to stand up to him when I was little, but now I’m getting increasingly uncomfortable with him. | |
| 4 | Friend: My brother has excellent grades, so my parents always compare me with him. | |
| 5 | Friend: Why is my older sister so pretty and doing well in school, everyone likes her. | |
| 6 | Friend: I received the acceptance letter from my dream university today! | |
| 7 | Friend: The math teacher speaks so fast, I can’t follow, and my rank dropped 100 in the final exam. | |
| 8 | Friend: The final exam is so near, and I'm worried I won’t do well. | |
| 9 | Friend: I used to have a really close friend, but suddenly she started ignoring me. Maybe I said something wrong, but when I asked her, she didn’t say anything. I feel terrible. | |
| 10 | Friend: Every time I enter a new school or class, I never know what to talk to the new classmates. It feels so awkward, I always end up alone. | |
| 11 | Friend: I don’t want to go to school anymore. My classmates always call my names. | |
| 12 | Friend: It's so annoying how our homeroom teacher tries to control everything. I don't even want to listen to what he/she says or pay attention in class. | |
| 13 | Friend: I'm in my late twenties and have never been in a relationship. My friends say I’m good, but I've failed with every person I've pursued so far. | |
| 14 | Boyfriend/Girlfriend: I love sharing things with you, but you don't really respond to me much. | |
| 15 | Boyfriend/Girlfriend: Sometimes I wonder how someone as terrible as me could ever be worthy of someone like you. | |
| 16 | Boyfriend/Girlfriend: You keep on saying that you're upset, but when I ask you about it, you don't tell me anything. | |
| 17 | Friend: My boyfriend/girlfriend and I have been together for five years, but he/she just called to break up with me. I don’t know what to do now. | |
| 18 | Friend: It's been over three months since we broke up, but I still can't let go and keep wanting to contact him/her. | |
| 19 | Friend: I'm so slow at getting the hang of things at work, and I keep making silly mistakes. I feel like I'm just not good enough. | |
| 20 | Friend: The mentor who's supposed to guide me is really busy and rarely gives me feedback, so I have no idea how I'm doing. | |
| 21 | Friend: This work is getting boring; every day feels like the same routine. | |
| 22 | Friend: A new colleague joined recently, and she seems really capable and much more outgoing than me. I feel so inferior. . | |
| 23 | Friend: There's a coworker who’s always making snarky comments at me. Whenever my boss gives me a little more attention, she mocks me. | |
| 24 | Friend: My boss keeps criticizing me in everything, but I've been staying up late to finish his tasks. | |
| 25 | Friend: I've had a client who keeps making vague requests recently. I've submitted so many drafts, but none of them satisfied him. When I ask what he needs, he just kept answering vaguely. | |
| 26 | Customer: I went shopping for clothes today and I look so fat. It was hard to find the right size and style. | |
| 27 | Customer: I went to the mall to buy a bag today, but the salesperson was really dismissive just because I was dressed plainly | |
| 28 | Customer: Tomorrow is my first day at work, and I feel like I don't have anything suitable to wear. | |
| 29 | Customer: Isn’t there a discount for regular customers? | |
| 30 | Customer: The phone I bought just two months ago has been frequently crashing, even though I have never dropped it. | |
| 31 | Customer: I booked a three-day stay at your hotel, but starting from the second day, my room wasn’t cleaned. I definitely hung up the "clean my room" sign. | |
| 32 | Patient: Doctor, I’ve been losing a lot of hair lately. Every time I wash my hair, a big bunch falls out. And I can’t fall asleep until after 2 AM; it’s really unbearable! | |
| 33 | Patient: Doctor, I heard that pacemakers need to be replaced every few years. Isn’t that really troublesome? | |
| 34 | Patient: Why do I need so many tests just to check my heart? | |
| 35 | Friend: My dog passed away today. He’d been with me for ten years. | |
| 36 | Friend: My grandfather passed away in a car accident not long ago, and I've been dreaming about him a lot lately. I feel like he's still with me. | |
| 37 | Friend: Will AI replace humans? What if I can’t find a job in the future? | |
| 38 | Friend: From the perspective of the entire Earth and the universe, humanity is insignificant in both space and time. Human existence means nothing on a cosmic scale. | |
| 39 | Friend: The girls on Xiaohongshu are so pretty—so fair, slim, and stylish! | |
| 40 | Friend: Did you see that news about Baoli? Having a high degree doesn’t really mean having a high morality. | |

| (b) | | 条目/ Items (Original Chinese Version) |
| --- | --- | --- |
| 1 | 朋友：我小的时候父母很少管我，现在我都成年了，他们却要干涉我是否结婚，找什么样的工作，好搞笑！ | |
| 2 | 朋友：我爸妈总让我帮他们处理琐碎的事，比如网购、预约门诊之类的，教了他们也不会，总是依赖我，好烦，我也有自己的事要做!！ | |
| 3 | 朋友：我爸大男子主义，小时候我不敢顶撞他，但现在越来越看不惯他的言行。 | |
| 4 | 朋友：我哥成绩很好，爸妈总喜欢把我俩放在一起比较。 | |
| 5 | 朋友：凭什么姐姐长得又漂亮，学习还好，所有人都喜欢她。 | |
| 6 | 朋友：我今天收到心仪大学的录取通知书了! | |
| 7 | 朋友：数学课老师讲得好快，听不懂，期末考试退步了一百名。 | |
| 8 | 朋友：马上就要期末考了，我好怕自己考不好。 | |
| 9 | 朋友：之前和我关系很好的舍友突然对我不理不睬，可能是我说错话惹怒了她，但我问她原因她又说没什么，我感觉好难受。 | |
| 10 | 朋友：每次进入新学校新班级，我总是不知道怎么和新同学说话，感觉很刻意，所以我总是一个人。 | |
| 11 | 朋友：我不想去学校了，我们班同学老给我起外号。 | |
| 12 | 朋友：好烦班主任什么都管，他说的话，上的课我都不想听。 | |
| 13 | 朋友：我二十好几还没有谈过恋爱，身边朋友说我条件还不错，可是之前追求过几位异性都失败了。 | |
| 14 | 男/女朋友：我分享欲很强，但你回应很少。 | |
| 15 | 男/女朋友：我有时候总在想我这么糟糕的一个人，怎么会配得上你这么好的人。 | |
| 16 | 男/女朋友：你总说自己很烦，但是我问你你又不说。 | |
| 17 | 朋友：我和我男朋友在一起五年了，刚刚他打电话和我说分手，我现在不知道怎么办。 | |
| 18 | 朋友：已经分手三个多月了，但我还是放不下他，总想联系他。 | |
| 19 | 朋友：公司里的很多工作我上手好慢，而且总是犯一些低级错误，我太差劲了。 | |
| 20 | 朋友：带教我的老师很忙，很少给我反馈，我不知道自己做得怎么样。 | |
| 21 | 朋友：工作越来越没劲了，每天都在重复相同的事。 | |
| 22 | 朋友：最近新来了一个同事，感觉她工作能力蛮强的，也比我更开朗，我好差。 | |
| 23 | 朋友：有个同事总对我阴阳怪气，上司多提点我两句，她就嘲讽我。 | |
| 24 | 朋友：上司总是说我这儿做得不好，那儿做得不好，可我已经在熬夜完成他的任务了。 | |
| 25 | 朋友：最近碰到一个客户，总是提一些很空洞的要求，给他出了好几稿他都不满意，问他需要什么还是讲得很宽泛。 | |
| 26 | 朋友：今天我去商场买衣服，感觉自己好胖啊，好难找到合适的尺码和款式。 | |
| 27 | 朋友：今天我去商场买包，导购看我穿得普通就对我很敷衍。 | |
| 28 | 顾客：我明天第一天上班，感觉衣柜里没有什么合适的衣服。 | |
| 29 | 顾客：老顾客也没有优惠么？ | |
| 30 | 顾客：我刚买两个月的手机就经常出现闪退、黑屏的情况，而且我并没有摔过它。 | |
| 31 | 顾客：我在咱们酒店定了三天，但是第二天开始就不打扫我的房间了，我明明挂了清扫的牌子。 | |
| 32 | 患者：医生，我这段时间脱发很严重，每次洗头都掉一大把，而且晚上要到两点多才能入睡，很难受！ | |
| 33 | 患者：医生，听说起搏器每隔几年就要换一次，会不会很麻烦啊？ | |
| 34 | 患者：查个心脏怎么要做这么多检查啊？ | |
| 35 | 朋友：我家的狗狗今天去世了，他都陪伴我十年了。 | |
| 36 | 朋友：爷爷前段时间出交通意外走了，我最近老做梦梦见他，我觉得他好像还在我身边。 | |
| 37 | 朋友：AI会不会替代人类啊，我以后没有工作怎么办？ | |
| 38 | 朋友：以整个地球和宇宙的尺度来说，人类不管是在空间上还是时间上都是那么微不足道，人类的存在在宇宙维度上看根本就没有任何意义。 | |
| 39 | 朋友：小红书上的女生都好漂亮啊，又白又瘦还会穿搭！ | |
| 40 | 朋友：你看包丽那个新闻了么，高学历真的不代表高品德。 | |

**Table S2.** The average scores and rankings for 17 items.

|  | Average Score | Ranking |
| --- | --- | --- |
| **1** | **8.26** | **3** |
| **4** | **7.84** | **6** |
| 6 | 5.89 | 11 |
| 10 | 3.41 | 15 |
| **13** | **7.54** | **8** |
| 15 | 5.30 | 14 |
| **16** | **8.81** | **1** |
| **18** | **8.12** | **5** |
| 21 | 5.40 | 13 |
| **24** | **7.82** | **7** |
| **25** | **8.30** | **2** |
| 26 | 5.58 | 12 |
| **28** | **7.29** | **9** |
| 30 | 6.42 | 10 |
| 34 | 2.50 | 16 |
| **36** | **8.15** | **4** |
| 38 | 2.35 | 17 |

**Table S3.** Example answers from LLMs and human participants.

| **Romance Scenarios**  Boyfriend/Girlfriend: “You keep on saying that you're upset, but when I ask you about it, you don't tell me anything.” | | |
| --- | --- | --- |
|  | Translated English Version | Original Chinese Version |
| Response from GPT4 | “Dear, if I've made you feel uneasy. I might be trying to understand and process these feelings myself. Please give me some time, I’ll share them with you as soon as I can. In the meantime, if there's anything on your mind, please let me know, we can get through this together.” | “亲爱的，抱歉让你感觉不安。可能是我自己也在试图理解和处理这些感受。请给我一点时间，我会尽快和你分享的。同时，如果你有任何想说的，也请告诉我，我们可以一起度过。” |
| Response from GPT3.5 | “Honey, sometimes I might feel upset, but I know I don’t always have to show it. If you have any questions or concerns, feel free to ask me, I will try my best to share and resolve them with you. Your care means a lot to me.” | “亲爱的，有时候我可能觉得烦恼，但我也知道不总是要表达出来。如果你有任何问题或担忧，尽管问我，我会尽力与你分享并解决。你的关心对我很重要。” |
| Response from Tongyi Qianwen 2.0 | “Sometimes, I feel stressed and overwhelmed, maybe because of work, studies, or just life in general. When I'm feeling down, I might not want to talk about it because I worry it could make me feel worse. But I'll do my best to understand your concern and will share my feelings with you when the time is right.” | “有时候，我会感到压力和困扰，可能是因为工作、学习或者生活中的某些事情。当我感到烦躁的时候，我可能不想谈论这些事情，因为我觉得这样会让自己的情绪更加低落。但是，我会尽量理解你的关心和担心，并且在适当的时候与你分享我的感受。” |
| Response from iFlytek Spark v3.0 | “I’m sorry if I make you feel puzzled. Sometimes I just need some time to process my emotions and thoughts. Would you like to share your concerns with me? I’ll try my best to help you.” | “对不起，如果我让你感到困扰了。我只是有时候需要一些时间来处理自己的情绪和想法。你愿意和我分享一下你的烦恼吗？我会尽力帮助你的。” |
| Response from ERNIE Bot 4.0 | “Sorry, babe. I might be a little emotional, but I didn’t mean to make you worry. I’ll try to control my emotions, and I appreciate you support and understanding.” | “对不起，宝贝，我可能有点情绪化，但我不是故意要让你担心的。我会试着控制自己的情绪，也谢谢你的理解和支持。” |
| Response of average-empathy young adults | “I wanted to reply to you, but please let me sort out my emotions first so I don’t feel uncomfortable when talking to you.” | “我也很想回你的，但是我想先把我自己的情绪调整好，这样和你说话你也不难受。” |
| Response of high-empathy young adults | “I sorry that I’ve let you feel this way, I didn’t mean to stay silent, I do care about you. It’s just sometimes I struggle to express myself, or I don’t even understand how I feel. If you’re willing to give me a little more time and space, I’ll be able to gather my thoughts and talk to you later, I’ll always love you.” | “很抱歉让你有这样的感受，我并不是故意不告诉你，我也很重视你。只是有的时候我无法清楚地表达自己，或者无法完全理解我自己。如果你愿意的话可以给我一些时间和空间，让我整理好我的思绪再和你一起详谈，我会一直爱你。” |

**Table S4.** Filter Questions Used to Retain Valid Responses.

| Translated English Version | Filter Question：Identify the expressions in the following response that correspond to the emotional reaction, interpretation, and exploration.  Q: My whole family hates me.  A: I'm sorry you're going through this. If my family treated me like that, I’ll definitely feel isolated. Would you like to tell me what happened?  Which sentence shows emotional reaction best?  Which sentence shows interpretation best?  Which sentence shows exploration best? |
| --- | --- |
| Original Chinese Version | 检测题：找出下列回复中对应情绪回应、诠释和探索维度的表达。  Q:我全家人都讨厌我。  A:很遗憾你遇到了这样的事。如果我家人这样对我，我肯定觉得被孤立了。你愿意告诉我发生什么了么?  哪句话最能体现情绪回应维度?  哪句话最能体现诠释维度?  哪句话最能体现探索维度? |
